# Supplementary material for: Dehydroepiandrosterone-induced activation of mTORC1 and inhibition of autophagy contribute to skeletal muscle insulin resistance in a mouse model of polycystic ovary syndrome
Source: PubMed Central journal article supplement (PMC5844717; doi:10.18632/oncotarget.24190), 2018-01-12
Supplement: oncotarget-09-11905-s001.pdf [file oncotarget-09-11905-s001.pdf]

# Dehydroepiandrosterone-induced activation of mTORC1 and inhibition of autophagy contribute to skeletal muscle insulin resistance in a mouse model of polycystic ovary syndrome

## SUPPLEMENTARY MATERIALS

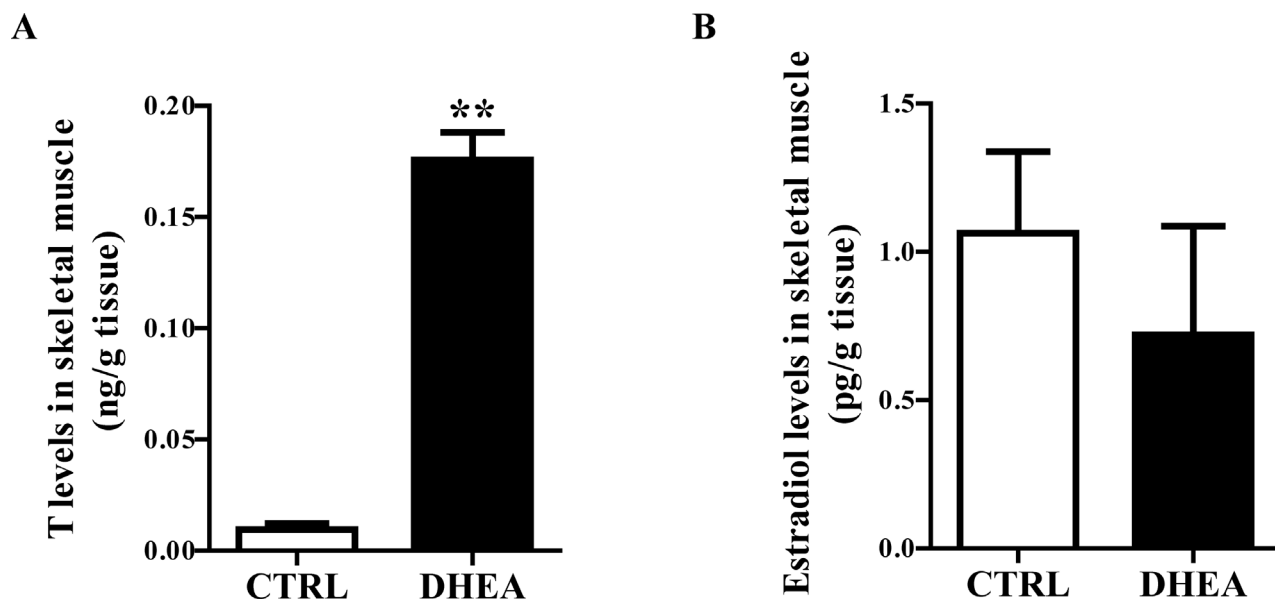

**Supplementary Figure 1: Levels of sex steroid hormones in the skeletal muscle of the mice.** (A) Testosterone levels in skeletal muscle. (B) Estradiol levels in skeletal muscle.  $n = 6/\text{group}$ . T: testosterone. Data are expressed as mean  $\pm$  SEM. \*\* $P < 0.01$ , vs control.

**A**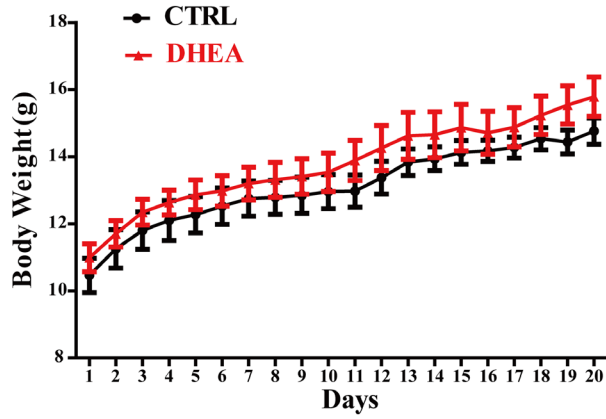**B**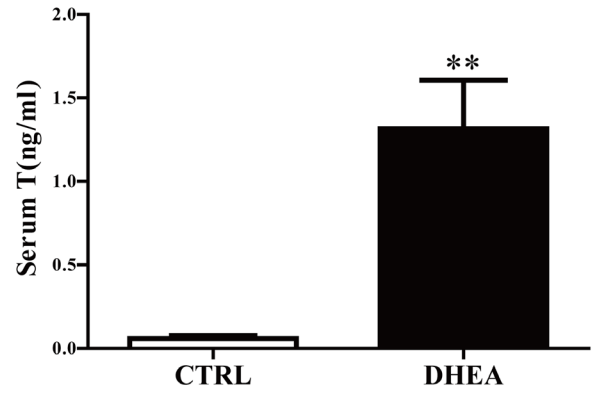**C**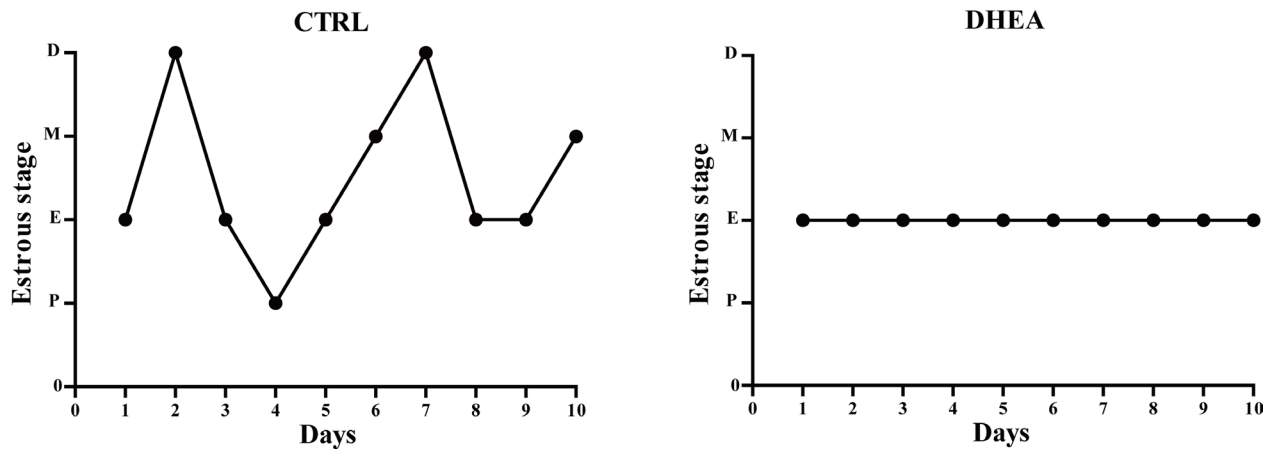

**Supplementary Figure 2: Body weight, serum testosterone levels, and estrous cycle in the mice.** (A) Body weight (B) Serum testosterone levels (C) Representative estrous cycle of one mouse from each group.  $n = 6/\text{group}$ . T: testosterone. Data are expressed as mean  $\pm$  SEM. \*\* $P < 0.01$ , vs control.
